# Supplementary material for: Screening of Bacteriocinogenic Lactic Acid Bacteria and Their Characterization as Potential Probiotics
Source: MDPI journal article supplement (doi:10.3390/microorganisms8030393), 2020-03-11
Supplement: s1 [file s1]

**Table S1.** Origin of LAB isolates used in this study

| LAB   | Origin            | LAB    | Origin            | LAB   | Origin            | LAB     | Origin                   |
|-------|-------------------|--------|-------------------|-------|-------------------|---------|--------------------------|
| A1.1  | Fermented sausage | A9.9   | Fermented sausage | A19.7 | Fermented sausage | A31.3   | Fermented sausage        |
| A1.2  | Fermented sausage | A10.1  | Fermented sausage | A19.8 | Fermented sausage | A31.4   | Fermented sausage        |
| A1.3  | Fermented sausage | A10.2  | Fermented sausage | A20.1 | Fermented sausage | A31.5   | Fermented sausage        |
| A1.4  | Fermented sausage | A10.3  | Fermented sausage | A20.2 | Fermented sausage | A31.6   | Fermented sausage        |
| A1.5  | Fermented sausage | A10.4  | Fermented sausage | A20.3 | Fermented sausage | A32.1   | Fermented sausage        |
| A1.6  | Fermented sausage | A10.5  | Fermented sausage | A20.4 | Fermented sausage | A32.2   | Fermented sausage        |
| A1.7  | Fermented sausage | A10.6  | Fermented sausage | A20.5 | Fermented sausage | A32.3   | Fermented sausage        |
| A2.1  | Fermented sausage | A10.7  | Fermented sausage | A21.1 | Fermented sausage | A33.1   | Fermented sausage        |
| A2.2  | Fermented sausage | A10.8  | Fermented sausage | A21.2 | Fermented sausage | A33.2   | Fermented sausage        |
| A2.3  | Fermented sausage | A10.9  | Fermented sausage | A21.3 | Fermented sausage | A33.3   | Fermented sausage        |
| A2.4  | Fermented sausage | A10.10 | Fermented sausage | A21.4 | Fermented sausage | A33.4   | Fermented sausage        |
| A2.5  | Fermented sausage | A10.11 | Fermented sausage | A22.1 | Fermented sausage | A33.5   | Fermented sausage        |
| A3.1  | Fermented sausage | A11.1  | Fermented sausage | A22.2 | Fermented sausage | A33.6   | Fermented sausage        |
| A3.2  | Fermented sausage | A11.2  | Fermented sausage | A22.3 | Fermented sausage | A33.7   | Fermented sausage        |
| A3.3  | Fermented sausage | A11.3  | Fermented sausage | A22.4 | Fermented sausage | A34.1   | Fermented sausage        |
| A3.4  | Fermented sausage | A11.4  | Fermented sausage | A22.5 | Fermented sausage | A34.2   | Fermented sausage        |
| A3.5  | Fermented sausage | A11.5  | Fermented sausage | A22.6 | Fermented sausage | A34.3   | Fermented sausage        |
| A3.6  | Fermented sausage | A11.6  | Fermented sausage | A23.1 | Fermented sausage | A34.4   | Fermented sausage        |
| A3.7  | Fermented sausage | A11.7  | Fermented sausage | A23.2 | Fermented sausage | A34.5   | Fermented sausage        |
| A4.1  | Fermented sausage | A11.8  | Fermented sausage | A23.3 | Fermented sausage | A35.1   | Fermented sausage        |
| A4.2  | Fermented sausage | A12.1  | Fermented sausage | A23.4 | Fermented sausage | A35.2   | Fermented sausage        |
| A4.3  | Fermented sausage | A12.2  | Fermented sausage | A23.5 | Fermented sausage | A35.3   | Fermented sausage        |
| A4.4  | Fermented sausage | A12.3  | Fermented sausage | A23.6 | Fermented sausage | A35.4   | Fermented sausage        |
| A4.5  | Fermented sausage | A12.4  | Fermented sausage | A23.7 | Fermented sausage | A35.5   | Fermented sausage        |
| A4.6  | Fermented sausage | A12.5  | Fermented sausage | A24.1 | Fermented sausage | A35.6   | Fermented sausage        |
| A4.7  | Fermented sausage | A12.6  | Fermented sausage | A24.2 | Fermented sausage | A36.1   | Fermented sausage        |
| A4.8  | Fermented sausage | A12.7  | Fermented sausage | A24.3 | Fermented sausage | A36.2   | Fermented sausage        |
| A4.9  | Fermented sausage | A12.8  | Fermented sausage | A24.4 | Fermented sausage | A36.3   | Fermented sausage        |
| A4.10 | Fermented sausage | A12.9  | Fermented sausage | A24.5 | Fermented sausage | A36.4   | Fermented sausage        |
| A4.11 | Fermented sausage | A12.10 | Fermented sausage | A24.6 | Fermented sausage | A36.5   | Fermented sausage        |
| A5.1  | Fermented sausage | A12.11 | Fermented sausage | A24.5 | Fermented sausage | A36.6   | Fermented sausage        |
| A5.2  | Fermented sausage | A12.12 | Fermented sausage | A25.1 | Fermented sausage | A36.7   | Fermented sausage        |
| A5.3  | Fermented sausage | A13.1  | Fermented sausage | A25.2 | Fermented sausage | A36.8   | Fermented sausage        |
| A5.4  | Fermented sausage | A13.2  | Fermented sausage | A25.3 | Fermented sausage | A36.9   | Fermented sausage        |
| A5.5  | Fermented sausage | A13.3  | Fermented sausage | A25.4 | Fermented sausage | A36.10  | Fermented sausage        |
| A5.6  | Fermented sausage | A13.4  | Fermented sausage | A25.5 | Fermented sausage | K34     | Fermented sausage        |
| A5.7  | Fermented sausage | A13.5  | Fermented sausage | A25.6 | Fermented sausage | Q42     | Cheese                   |
| A5.8  | Fermented sausage | A13.6  | Fermented sausage | A26.1 | Fermented sausage | Q43     | Cheese                   |
| A5.9  | Fermented sausage | A13.7  | Fermented sausage | A26.2 | Fermented sausage | Q43     | Cheese                   |
| A5.10 | Fermented sausage | A13.8  | Fermented sausage | A26.3 | Fermented sausage | DT016   | Lettuce                  |
| A6.1  | Fermented sausage | A14.1  | Fermented sausage | A26.4 | Fermented sausage | SB83    | Seafood                  |
| A6.2  | Fermented sausage | A14.2  | Fermented sausage | A26.5 | Fermented sausage | ALP7    | Shellfish                |
| A6.3  | Fermented sausage | A14.3  | Fermented sausage | A26.6 | Fermented sausage | R23     | Arugula                  |
| A6.4  | Fermented sausage | A15.1  | Fermented sausage | A26.7 | Fermented sausage | CFF4    | Cambodian fermented fish |
| A7.1  | Fermented sausage | A15.2  | Fermented sausage | A27.1 | Fermented sausage | CFF5    | Cambodian fermented fish |
| A7.2  | Fermented sausage | A15.3  | Fermented sausage | A27.2 | Fermented sausage | CFF51   | Cambodian fermented fish |
| A7.3  | Fermented sausage | A15.4  | Fermented sausage | A27.3 | Fermented sausage | CFF202  | Cambodian fermented fish |
| A7.4  | Fermented sausage | A15.5  | Fermented sausage | A27.4 | Fermented sausage | ST153   | Smoked salmon            |
| A7.5  | Fermented sausage | A16.1  | Fermented sausage | A27.5 | Fermented sausage | SS100.2 | Smoked salmon            |
| A7.6  | Fermented sausage | A16.2  | Fermented sausage | A28.1 | Fermented sausage | SS102.1 | Smoked salmon            |
| A7.7  | Fermented sausage | A16.3  | Fermented sausage | A28.2 | Fermented sausage | SS104.1 | Smoked salmon            |
| A7.8  | Fermented sausage | A16.4  | Fermented sausage | A28.3 | Fermented sausage | SS107.1 | Smoked salmon            |
| A7.9  | Fermented sausage | A16.5  | Fermented sausage | A28.4 | Fermented sausage | SS107.2 | Smoked salmon            |
| A7.10 | Fermented sausage | A16.6  | Fermented sausage | A28.5 | Fermented sausage | SS110   | Smoked salmon            |
| A7.11 | Fermented sausage | A16.7  | Fermented sausage | A28.6 | Fermented sausage | SS114   | Smoked salmon            |
| A8.1  | Fermented sausage | A16.8  | Fermented sausage | A29.1 | Fermented sausage | SS117   | Smoked salmon            |
| A8.2  | Fermented sausage | A17.1  | Fermented sausage | A29.2 | Fermented sausage | SS118   | Smoked salmon            |
| A8.3  | Fermented sausage | A17.2  | Fermented sausage | A29.3 | Fermented sausage | SS121   | Smoked salmon            |
| A8.4  | Fermented sausage | A18.1  | Fermented sausage | A29.4 | Fermented sausage | SS126.2 | Smoked salmon            |
| A8.5  | Fermented sausage | A18.2  | Fermented sausage | A29.5 | Fermented sausage | SS127   | Smoked salmon            |
| A8.6  | Fermented sausage | A18.3  | Fermented sausage | A29.6 | Fermented sausage | SS128   | Smoked salmon            |
| A8.7  | Fermented sausage | A18.4  | Fermented sausage | A29.7 | Fermented sausage | SS139   | Smoked salmon            |
| A9.1  | Fermented sausage | A18.5  | Fermented sausage | A29.8 | Fermented sausage | SS144   | Smoked salmon            |
| A9.2  | Fermented sausage | A18.6  | Fermented sausage | A30.1 | Fermented sausage | SS148   | Smoked salmon            |
| A9.3  | Fermented sausage | A19.1  | Fermented sausage | A30.2 | Fermented sausage | SS149   | Smoked salmon            |
| A9.4  | Fermented sausage | A19.2  | Fermented sausage | A30.3 | Fermented sausage | SS165   | Smoked salmon            |
| A9.5  | Fermented sausage | A19.3  | Fermented sausage | A30.4 | Fermented sausage | SS167   | Smoked salmon            |
| A9.6  | Fermented sausage | A19.4  | Fermented sausage | A30.5 | Fermented sausage | SS168   | Smoked salmon            |
| A9.7  | Fermented sausage | A19.5  | Fermented sausage | A31.1 | Fermented sausage | SS170   | Smoked salmon            |
| A9.8  | Fermented sausage | A19.6  | Fermented sausage | A31.2 | Fermented sausage | SS195   | Smoked salmon            |
