# Supplementary material for: Screening of Bacteriocinogenic Lactic Acid Bacteria and Their Characterization as Potential Probiotics
Source: MDPI journal article supplement (doi:10.3390/microorganisms8030393), 2020-03-11
Supplement: s1 [file s1]

*Pediococcus pentosaceus*\_CFF51  
*Pediococcus pentosaceus*\_CFF202  
*Pediococcus pentosaceus*\_CFF5  
90 *Pediococcus pentosaceus*\_CFF4  
72 *Pediococcus pentosaceus*\_Q43  
*Pediococcus pentosaceus*\_Q42  
62 *Pediococcus pentosaceus* strain DSM 20336 T 16S ribosomal RNA gene partial sequence  
*Pediococcus pentosaceus* gene for 16S ribosomal RNA partial sequence strain: JCM 5890  
*Pediococcus claussenii* strain ATCC BAA-344 16S ribosomal RNA partial sequence  
97 *Pediococcus damnosus* strain JCM 5886 16S ribosomal RNA partial sequence  
*Pediococcus parvulus* strain NBRC 100673 16S ribosomal RNA partial sequence  
96 *Lactobacillus plantarum*\_R23  
72 *Lactobacillus pentosus* gene for 16S ribosomal RNA partial sequence strain: JCM 1558  
*Lactobacillus plantarum* strain JCM 1149 16S ribosomal RNA partial sequence  
*Lactobacillus paraplantarum* JCM 12533 gene for 16S ribosomal RNA partial sequence  
*Ferroplasma acidiphilum* strain Y 16S ribosomal RNA partial sequence

0.1
